# Supplementary material for: Quality Attributes of Cryoconcentrated Calafate (Berberis microphylla) Juice during Refrigerated Storage
Source: PubMed Central journal article supplement (PMC7555764; doi:10.3390/foods9091314), 2020-09-18
Supplement: foods-09-01314-s001.pdf [file foods-09-01314-s001.pdf]

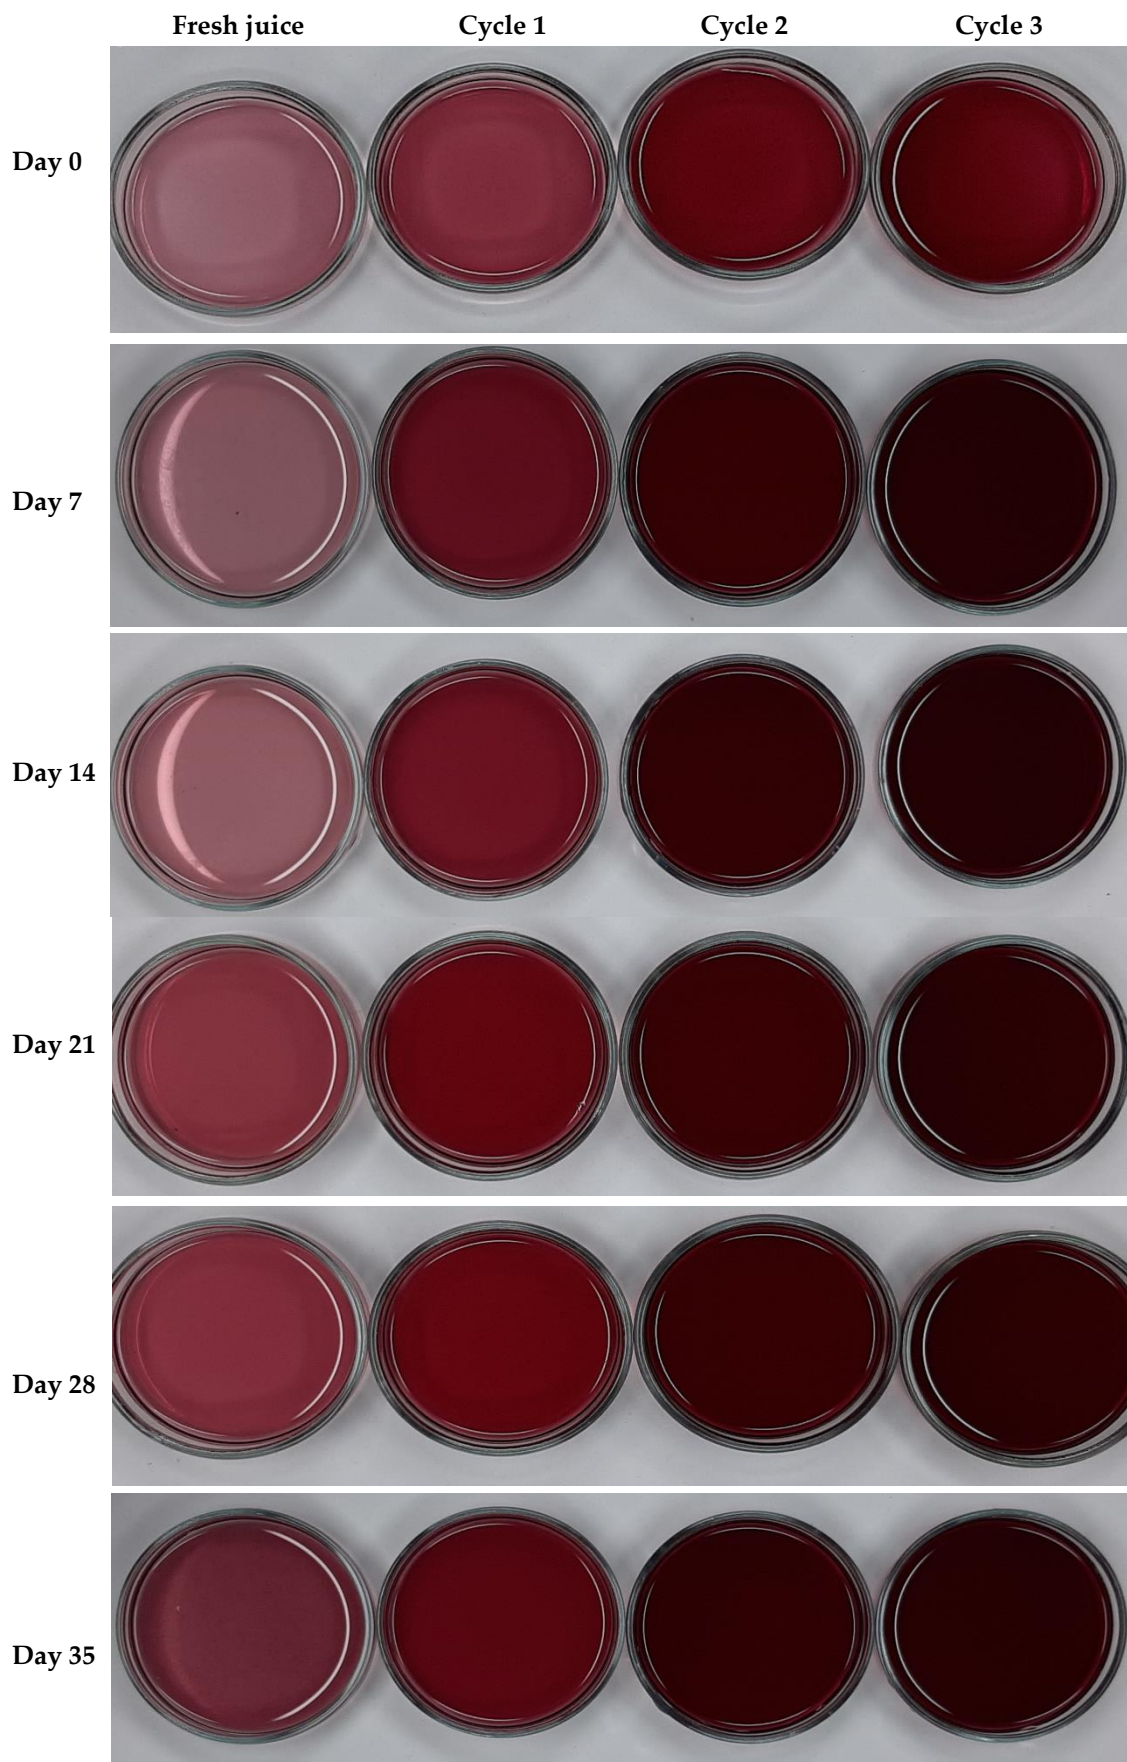

Fig. S1. Visual appearance of fresh juice and concentrate samples at each cycle during storage.

**Table S1.** Pearson's correlation coefficients (r) between biological active compounds content of fresh calafate juice.

|      | TPC   | TAC   | TFC   | DPPH  | ABTS  | FRAP  | ORAC |
|------|-------|-------|-------|-------|-------|-------|------|
| TPC  | 1.00  |       |       |       |       |       |      |
| TAC  | 1.00* | 1.00  |       |       |       |       |      |
| TFC  | 0.99* | 1.00* | 1.00  |       |       |       |      |
| DPPH | 0.99* | 1.00* | 1.00* | 1.00  |       |       |      |
| ABTS | 0.97* | 0.98* | 0.98* | 0.99* | 1.00  |       |      |
| FRAP | 0.97* | 0.98* | 0.98* | 0.99* | 1.00* | 1.00  |      |
| ORAC | 0.96* | 0.97* | 0.97* | 0.98* | 1.00* | 1.00* | 1.00 |

\*Significant at 5%.

**Table S2.** Pearson's correlation coefficients (r) between biological active compounds content (TBC and TAA) obtained by CBCC process (first cycle).

|      | TPC   | TAC   | TFC   | DPPH  | ABTS  | FRAP  | ORAC |
|------|-------|-------|-------|-------|-------|-------|------|
| TPC  | 1.00  |       |       |       |       |       |      |
| TAC  | 0.99* | 1.00  |       |       |       |       |      |
| TFC  | 0.98* | 1.00* | 1.00  |       |       |       |      |
| DPPH | 0.98* | 1.00* | 0.99* | 1.00  |       |       |      |
| ABTS | 0.98* | 1.00* | 0.99* | 1.00* | 1.00  |       |      |
| FRAP | 0.97* | 0.98* | 0.98* | 0.98* | 0.99* | 1.00  |      |
| ORAC | 0.97* | 0.98* | 0.97* | 0.98* | 0.99* | 1.00* | 1.00 |

\*Significant at 5%.

**Table S3.** Pearson's correlation coefficients (r) between biological active compounds content (TBC and TAA) obtained by CBCC process (second cycle).

|      | TPC   | TAC   | TFC   | DPPH  | ABTS  | FRAP  | ORAC |
|------|-------|-------|-------|-------|-------|-------|------|
| TPC  | 1.00  |       |       |       |       |       |      |
| TAC  | 0.96* | 1.00  |       |       |       |       |      |
| TFC  | 0.91* | 0.99* | 1.00  |       |       |       |      |
| DPPH | 0.96* | 1.00* | 0.99* | 1.00  |       |       |      |
| ABTS | 0.94* | 1.00* | 0.99* | 1.00* | 1.00  |       |      |
| FRAP | 0.94* | 0.99* | 0.98* | 0.99* | 0.99* | 1.00  |      |
| ORAC | 0.94* | 0.98* | 0.97* | 0.99* | 0.99* | 1.00* | 1.00 |

\*Significant at 5%.
